# Supplementary material for: Insight into the epidemiology of infective endocarditis in Portugal: a contemporary nationwide study from 2010 to 2018
Source: PubMed Central journal article supplement (PMC7962378; doi:10.1186/s12872-021-01937-3), 2021-03-16
Supplement: 12872_2021_1937_MOESM1_ESM.pdf [file 12872_2021_1937_MOESM1_ESM.pdf]

# Appendix

*Table S1. ICD-9 and ICD-10 codes used to identify infective endocarditis cases and associated factors.*

|                                              | ICD9                                                                                                                                        | ICD10                                                                                                 |
|----------------------------------------------|---------------------------------------------------------------------------------------------------------------------------------------------|-------------------------------------------------------------------------------------------------------|
| <b>Infective endocarditis</b>                | 421.0<br>421.1<br>421.9<br>424.9                                                                                                            | I33.0<br>I33.9<br>I38<br>I39                                                                          |
| <b>Previous medical history</b>              |                                                                                                                                             |                                                                                                       |
| <b>Diabetes mellitus</b>                     | 250                                                                                                                                         | E10<br>E11<br>E12<br>E13<br>E14                                                                       |
| <b>Cardiac valve disease</b>                 | 424.0 (Mitral V)<br>424.1 (Aortic V)<br>424.2 (Tricuspid V)<br>424.3 (Pulmonary V)                                                          | I34 (Mitral V)<br>I35 (Aortic V)<br>I36 (Tricuspid V)<br>I37 (Pulmonary V)                            |
| <b>Rheumatic disease</b>                     | 394 (Mitral V)<br>395 (Aortic V)<br>396 (Mitral and aortic V)<br>397 (Tricuspid and Pulmonary valves)<br>398 (Other rhematic heart disease) | I05 (Mitral V)<br>I06 (Aortic V)<br>I08 (Mitral and aortic V)<br>I07 (Tricuspid and Pulmonary valves) |
| <b>Atrial fibrillation</b>                   | 427.31                                                                                                                                      | I48.91                                                                                                |
| <b>Arterial hypertension</b>                 | 401                                                                                                                                         | I10<br>I11                                                                                            |
| <b>HIV</b>                                   | 042<br>V08<br>07953                                                                                                                         | E93727<br>D1286<br>C836<br>B20-B24                                                                    |
| <b>Chronic renal failure</b>                 | 585 (5850 – 5856)<br>586                                                                                                                    | N18 (N181-N189)                                                                                       |
| <b>Chronic renal failure on hemodialysis</b> | 5856<br>V451<br>V4511                                                                                                                       | N185                                                                                                  |
| <b>Cancer</b>                                | 140-239                                                                                                                                     | C00-C97                                                                                               |
| <b>COPD</b>                                  | 490-496                                                                                                                                     | J44.9                                                                                                 |
| <b>Congenital heart disease</b>              | 7460-7469                                                                                                                                   | Q20.0-Q20.4, Q21.2-Q21.8,<br>Q26.2                                                                    |
| <b>Use of opioid</b>                         | 30400-30403 (opioid use)                                                                                                                    | F11.1-F11.2 (opioid use)                                                                              |
| <b>Cardiac valve prosthesis</b>              | V433<br>99602<br>99671                                                                                                                      | Z952<br>Z953<br>Z954<br>Z959                                                                          |
| <b>Cardiac devices</b>                       | 99601<br>99604<br>99672<br>V5331<br>V4501                                                                                                   | Z95.0<br>Z95810<br>T827                                                                               |

|                                        |                                                                                                              |                                                                                                    |
|----------------------------------------|--------------------------------------------------------------------------------------------------------------|----------------------------------------------------------------------------------------------------|
| <b>Chronic coronary artery disease</b> | 414                                                                                                          | I25                                                                                                |
| <b>S/P PCI</b>                         | V45.82                                                                                                       | Z95.5                                                                                              |
| <b>S/P CABG</b>                        | V45.81                                                                                                       | Z95.1                                                                                              |
| <b>Chronic hepatic disease</b>         | 571                                                                                                          | K70<br>K74                                                                                         |
| <b>Microorganisms</b>                  |                                                                                                              |                                                                                                    |
| <b>Staphylococcus</b>                  | 0411<br>04111<br>04112<br>04119<br>0381<br>03810<br>03811<br>03812<br>03819                                  | A41.0<br>A41.1<br>A41.2<br>A49.0<br>A4101<br>A4102<br>Z22321<br>Z22322<br>B95.6<br>B95.7<br>B95.8  |
| <b>Streptococcus</b>                   | 041.0<br>0380<br>0382                                                                                        | A40.0, A40.1, A 40.2, A40.3,<br>A40.8, A40.9<br>A49.1<br>B95.0, B951, B953, B954,<br>B955<br>Z2233 |
| <b>Enterococcus</b>                    | 041.04                                                                                                       | A41.81<br>B952                                                                                     |
| <b>Gram negative</b>                   | 03840<br>04180<br>04185<br>03841<br>03842<br>03843<br>03844<br>03849<br>0413<br>0414<br>0415<br>0416<br>0417 | A41.5<br>A4150<br>A4151<br>A4152<br>A4153<br>A4159<br>B962<br>B963<br>B964<br>B965                 |
| <b>Anaerobes</b>                       | 48281<br>04184<br>0383<br>04182<br>04183                                                                     | A41.4                                                                                              |
| <b>Fungus</b>                          | 11281<br>1160                                                                                                | B37.6<br>B40                                                                                       |
| <b>Brucella</b>                        | 023                                                                                                          | A23                                                                                                |
| <b>Complications</b>                   |                                                                                                              |                                                                                                    |
| <b>Acute Myocardial Infarct</b>        | 410                                                                                                          | I21                                                                                                |
| <b>Heart failure</b>                   | 4280                                                                                                         | I50.0                                                                                              |

|                                                  |                                                                                                                           |                                                                                                        |
|--------------------------------------------------|---------------------------------------------------------------------------------------------------------------------------|--------------------------------------------------------------------------------------------------------|
|                                                  | 4281<br>4289                                                                                                              | I50.1<br>I50.9                                                                                         |
| <b>Ischemic stroke</b>                           | 433<br>434                                                                                                                | I63                                                                                                    |
| <b>Transient ischemic accident</b>               | 435<br>4359                                                                                                               | G459                                                                                                   |
| <b>Hemorrhagic stroke</b>                        | 430<br>431                                                                                                                | I60<br>I61<br>I62                                                                                      |
| <b>Non specified stroke</b>                      | 436<br>437                                                                                                                | I64                                                                                                    |
| <b>Systemic embolism</b>                         | 449                                                                                                                       | I74.0-I74.9                                                                                            |
| <b>Splenic abscess</b>                           | 28959                                                                                                                     | D73.3                                                                                                  |
| <b>Central nervous system abscess/meningitis</b> | 320<br>3200<br>3201<br>3203<br>32081<br>32082<br>32089<br>3209<br>11283<br>1142<br>11501<br>11511<br>3240<br>3241<br>3249 | G00X<br>G01X<br>G02X<br>G03X<br>G060                                                                   |
| <b>Acute renal failure</b>                       | 584 (5845-5849)                                                                                                           | N17                                                                                                    |
| <b>Sepsis</b>                                    | 99591<br>99592<br>78552                                                                                                   | A40<br>A41.0-A41.4<br>A41.8<br>R6521                                                                   |
| <b>Cardiac surgery</b>                           | 350.x – Closed valvotomy<br>351.x – Repair<br>352.x - Replacement                                                         | <b>Replacement:</b><br>02RF<br>02RG<br>02RH<br>02RJ4<br><b>Repair:</b><br>02QF<br>02QG<br>02QH<br>02QJ |
